# Supplementary material for: Associations of Leisure-Time Physical Activity Trajectories with Fruit and Vegetable Consumption from Childhood to Adulthood: The Cardiovascular Risk in Young Finns Study
Source: MDPI journal article supplement (doi:10.3390/ijerph16224437), 2019-11-12
Supplement: s1 [file s1]

Supplement 3. Filled checklist of guidelines for reporting on latent trajectory studies\*.

|     | Checklist Item                                                                                                                                                                                                                                      | Reported                                                                                                                                                                                                                              |
|-----|-----------------------------------------------------------------------------------------------------------------------------------------------------------------------------------------------------------------------------------------------------|---------------------------------------------------------------------------------------------------------------------------------------------------------------------------------------------------------------------------------------|
| 1.  | Is the metric of time used in the statistical model reported?                                                                                                                                                                                       | Yes                                                                                                                                                                                                                                   |
| 2.  | Is information presented about the mean and variance of time within a wave?                                                                                                                                                                         | No                                                                                                                                                                                                                                    |
| 3a. | Is the missing data mechanism reported?                                                                                                                                                                                                             | Yes                                                                                                                                                                                                                                   |
| 3b. | Is a description provided of what variables are related to attrition/missing data?                                                                                                                                                                  | Yes                                                                                                                                                                                                                                   |
| 3c. | Is a description provided of how missing data in the analyses were dealt with?                                                                                                                                                                      | Yes                                                                                                                                                                                                                                   |
| 4.  | Is information about the distribution of the observed variables included?                                                                                                                                                                           | Yes                                                                                                                                                                                                                                   |
| 5.  | Is the software mentioned?                                                                                                                                                                                                                          | Yes                                                                                                                                                                                                                                   |
| 6a. | Are alternative specifications of within-class heterogeneity considered (e.g., LGCA vs. LGMM) and clearly documented? If not, was sufficient justification provided as to eliminate certain specifications from consideration?                      | LGCA nor LGMM were not used. However, LTPA trajectories have been identified from the same data in previous paper by using group-based trajectory modelling.** Those trajectories are in line with the ones identified in this study. |
| 6b. | Are alternative specifications of the between-class differences in variance–covariance matrix structure considered and clearly documented? If not, was sufficient justification provided as to eliminate certain specifications from consideration? | LGCA nor LGMM were not used.                                                                                                                                                                                                          |

|      | Checklist Item                                                                                   | Reported                                   |
|------|--------------------------------------------------------------------------------------------------|--------------------------------------------|
| 7.   | Are alternative shape/functional forms of the trajectories described?                            | Not applicable in latent profile analyses. |
| 8.   | If covariates have been used, can analyses still be replicated?                                  | Yes                                        |
| 9.   | Is information reported about the number of random start values and final iterations included?   | Yes                                        |
| 10.  | Are the model comparison (and selection) tools described from a statistical perspective?         | Yes                                        |
| 11.  | Are the total number of fitted models reported, including a one-class solution?                  | Yes                                        |
| 12.  | Are the number of cases per class reported for each model (absolute sample size, or proportion)? | Yes                                        |
| 13.  | If classification of cases in a trajectory is the goal, is entropy reported?                     | Yes                                        |
| 14a. | Is a plot included with the estimated mean trajectories of the final solution?                   | Yes                                        |
| 14b. | Are plots included with the estimated mean trajectories for each model?                          | No                                         |

|      | Checklist Item                                                                                                                                        | Reported              |
|------|-------------------------------------------------------------------------------------------------------------------------------------------------------|-----------------------|
| 14c. | Is a plot included of the combination of estimated means of the final model and the observed individual trajectories split out for each latent class? | No                    |
| 15.  | Are characteristics of the final class solution numerically described (i.e., means, <i>SD/SE</i> , <i>n</i> , <i>CI</i> , etc.)?                      | Yes                   |
| 16.  | Are the syntax files available (either in the appendix, supplementary materials, or from the authors)?                                                | Yes, from the authors |

\* See reference: van de Schoot, R., Sijbrandij, M., Winter, S D., Depaoli. S. & Vermunt. J K. The GRoLTS-Checklist: Guidelines for Reporting on Latent Trajectory Studies. *Structural Equation Modeling*. 2017; 24, 451-467.

\*\* See reference: Rovio, S. et al. Longitudinal physical activity trajectories from childhood to adulthood and their determinants: The Young Finns Study. *Scand J Med Sci Sports*. 2018; 28, 1073-1083.
